# Supplementary material
Source: PubMed Central journal article supplement (PMC4839287)
Supplement: NIHMS770920-supplement-supplement_1.pdf [file NIHMS770920-supplement-supplement_1.pdf]

Appendix

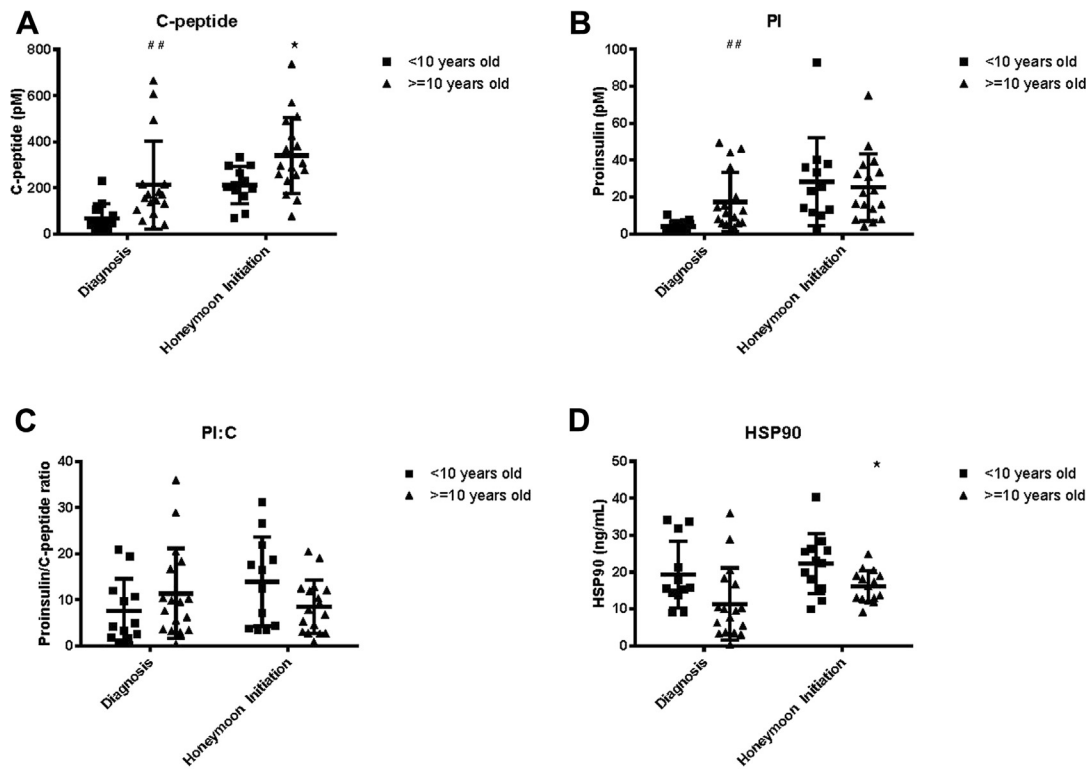

**Supplementary Fig 1.** Graphs grouping the 2 age categories (<10 and  $\geq 10$  years old) depicting  $\beta$ -cell secretory activity (A, B) and  $\beta$ -cell stress (C, D). Age grouping for C-peptide (A), PI (B), PI:C ratio (C), and HSP90 (D) levels in T1D subjects at diagnosis and at honeymoon divided into age categories <10 and  $\geq 10$ . Error bars display standard deviations from mean. ## $P < 0.01$  comparing subjects <10 with subjects  $\geq 10$  at diagnosis based on independent sample  $t$  test. \* $P < 0.05$  comparing subjects <10 with subjects  $\geq 10$  at honeymoon time point based on independent sample  $t$  test. HSP, heat shock protein; PI, proinsulin; T1D, type 1 diabetes.
